# Supplementary material
Source: PubMed Central journal article supplement (PMC4485881)
Supplement: Supp_Fig1.pdf [file Supp_Fig1.pdf]

## Supplementary Data

786-O and caki-1 cell lines were all transfected with a small dose of miR-134 mimics and negative control, respectively, to eliminate the effect caused by high dose of transfection.

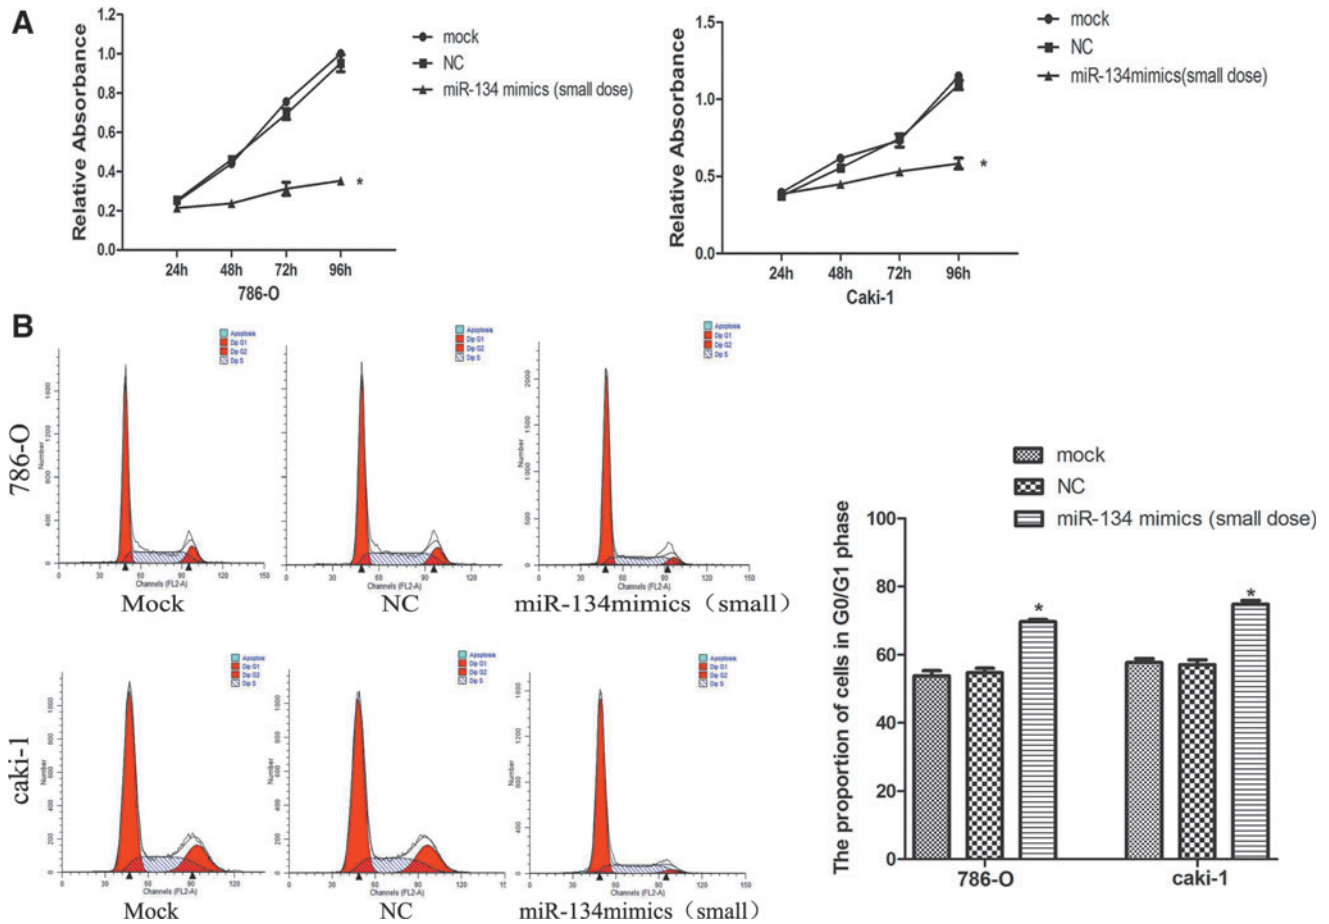

**SUPPLEMENTARY FIG. S1.** MiR-134 inhibits cell proliferation and induces cell cycle arrest in 786-O and caki-1 cell lines. **(A)** Assessment of cell proliferation by CCK-8 assay. The proliferation of 786-O and caki-1 cells was significantly inhibited by overexpression of miR-134. **(B)** Flow cytometry analysis showed that the cell cycle of 786-O and caki-1 cells was arrested at G1 after upregulation of miR-134. The histogram indicates the percentage of cells in G1. \* $p < 0.05$  compared with the mock or negative control group.
