# Supplementary material
Source: PubMed Central journal article supplement (PMC4485881)
Supplement: Supp_Fig2.pdf [file Supp_Fig2.pdf]

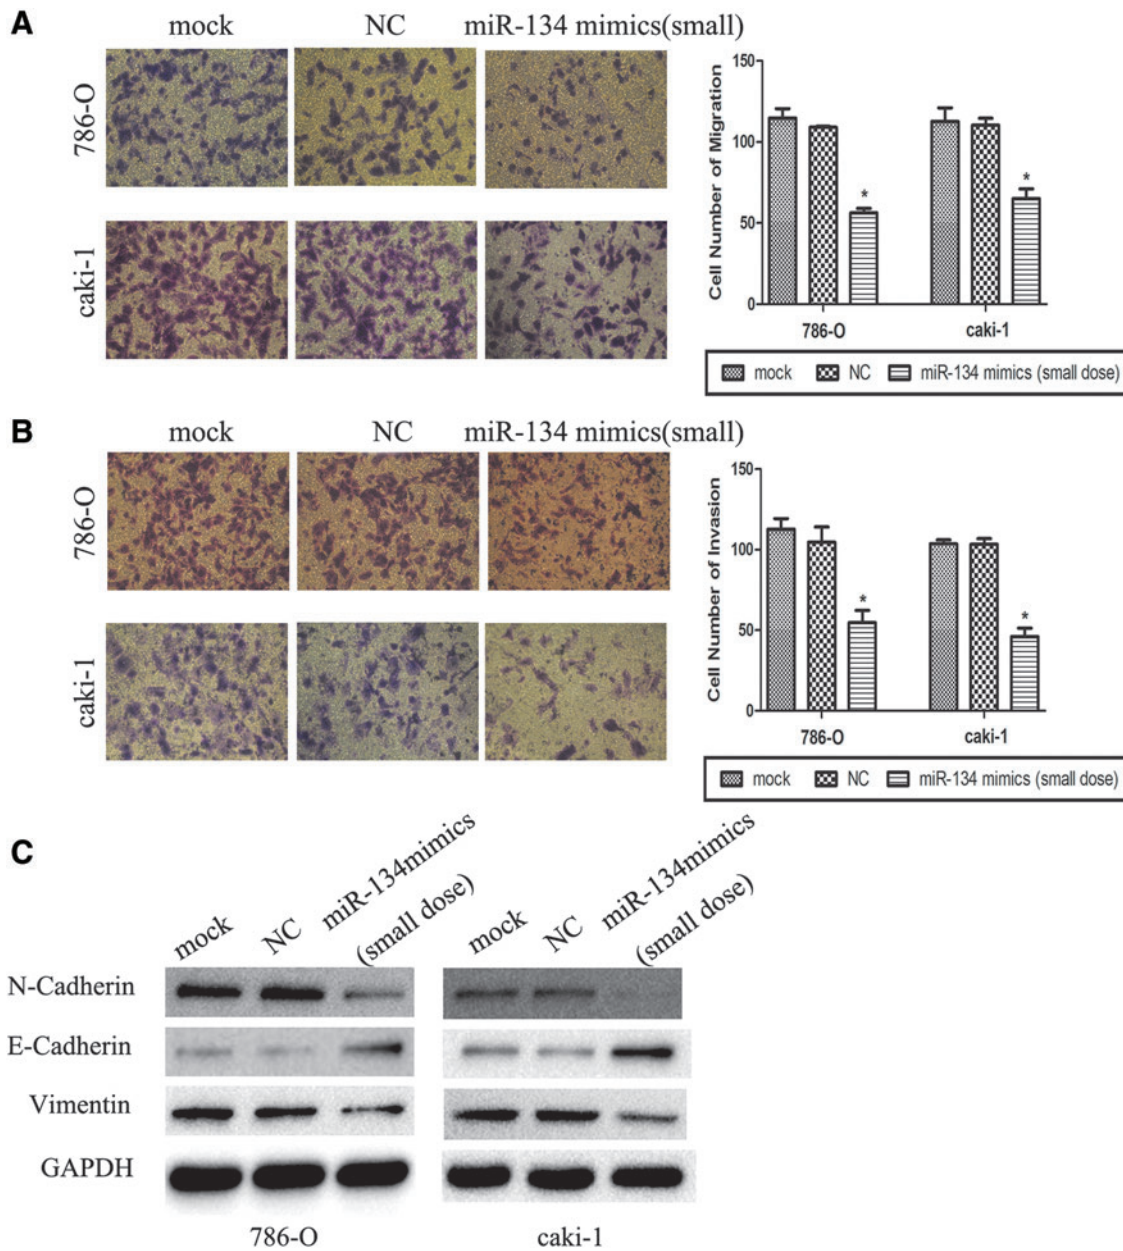

**SUPPLEMENTARY FIG. S2.** MiR-134 inhibits EMT in RCC cells. (C) Western blot analysis was used to detect the changes in EMT markers in 786-O and caki-1 cells treated with miR-134 mimics. A gain in E-cadherin expression and a loss of N-cadherin and vimentin were observed in treated cells. (A, B) Overexpression of miR-134 inhibited migration and invasion in RCC cell lines. Data are mean  $\pm$ SD of at least three independent experiments. \* $p < 0.05$ . Original magnification 200 $\times$ .
