# Supplementary material
Source: PubMed Central journal article supplement (PMC4485881)
Supplement: Supp_Fig3.pdf [file Supp_Fig3.pdf]

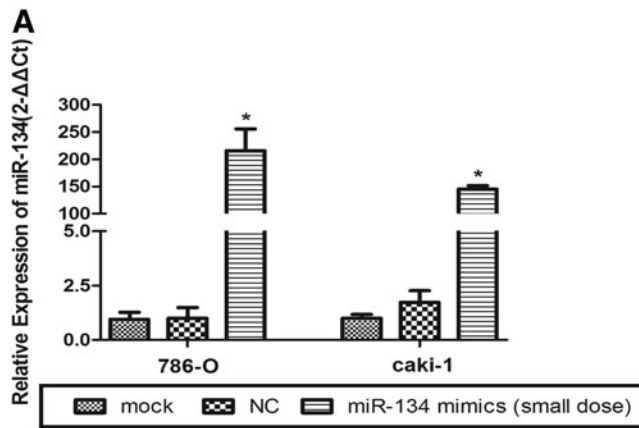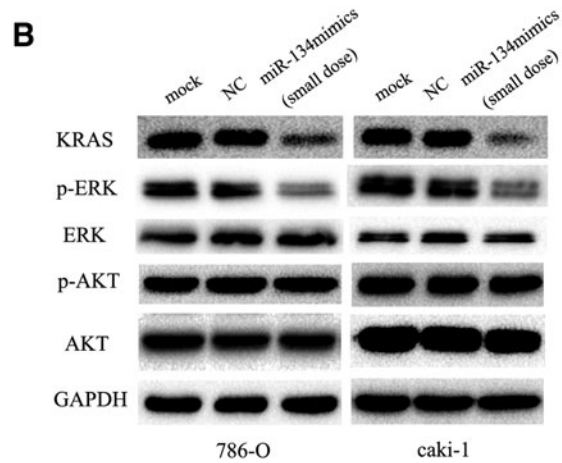

**SUPPLEMENTARY FIG. S3.** MiR-134 suppresses the RAS/MAPK/ERK pathway. **(A)** Relative expression of miR-134 in transfected cells. The expression of *miR-134* was relatively high in miR-134 mimic-transfected 786-O and caki-1 cells. **(B)** Western blot analysis of the RAS/MAPK/ERK pathway and AKT pathway. p-ERK was found to be decreased with a high expression of miR-134 and a low expression of KRAS, but no changes were found in the expression of p-Akt. \* $p < 0.05$  by *t*-test. All data are shown as mean  $\pm$  SD.
